# Supplementary material
Source: Springer Nature journal article supplement (https://www.springermedizin.de/resource/supplementary/12889_2012_4914_MOESM4_ESM.pdf/9492788)

## INTERVENTION

## USUAL CARE

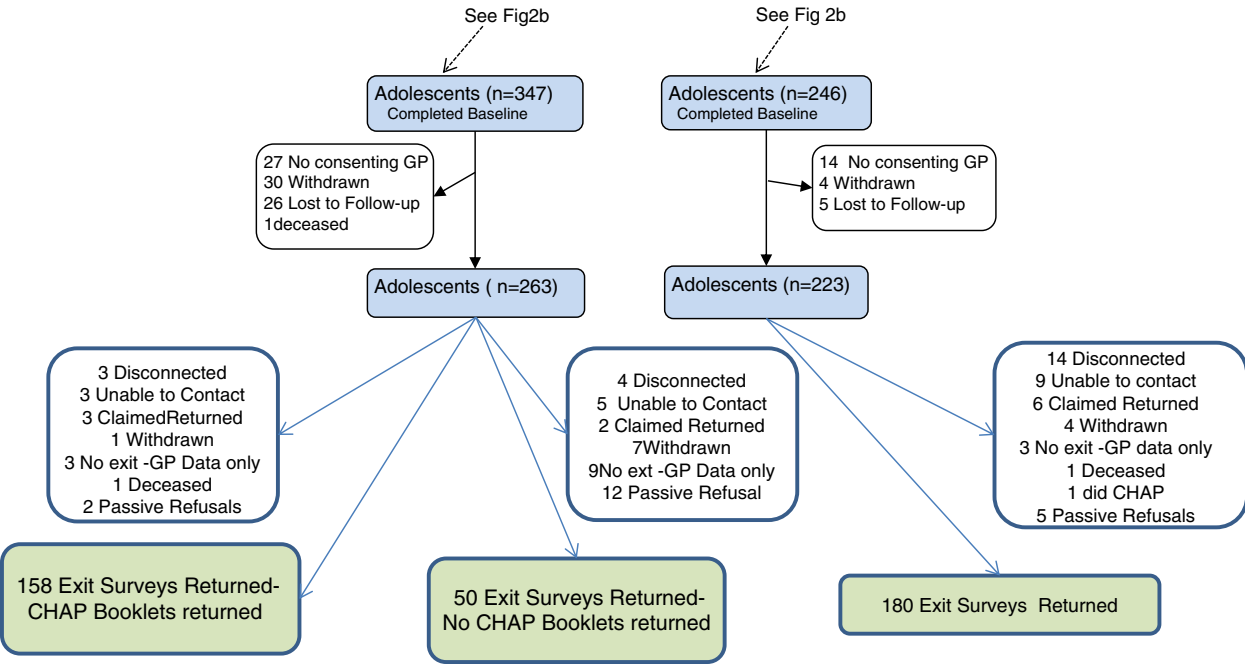

Supplement: MOESM4 [file 9492788]
